# Supplementary material for: SnS2/SnS p–n heterojunctions with an accumulation layer for ultrasensitive room-temperature NO2 detection
Source: Royal Society of Chemistry journal article supplement (doi:10.1039/c9nr02780g), 2019-01-01
Supplement: c9nr02780g1.pdf [file c9nr02780g1.pdf]

## Supporting Information

### **SnS<sub>2</sub>/SnS p-n heterojunctions with an accumulation layer for ultrasensitive room-temperature NO<sub>2</sub> detection**

Quan Sun,<sup>a</sup> Jiaxin Wang,<sup>a</sup> Juanyuan Hao,<sup>\*a,b</sup> Shengliang Zheng,<sup>a</sup> Peng Wan,<sup>a</sup> Tingting Wang,<sup>a</sup> Haitao Fang,<sup>a</sup> You Wang<sup>\*a,b</sup>

a. School of Materials Science and Engineering, Harbin Institute of Technology, Harbin 150001, P. R. China.

Email: jyhao@hit.edu.cn; y-wang@hit.edu.cn

b. Key Laboratory of Micro-Systems and Micro-Structures Manufacturing, Ministry of Education, Harbin 150001, P. R. China

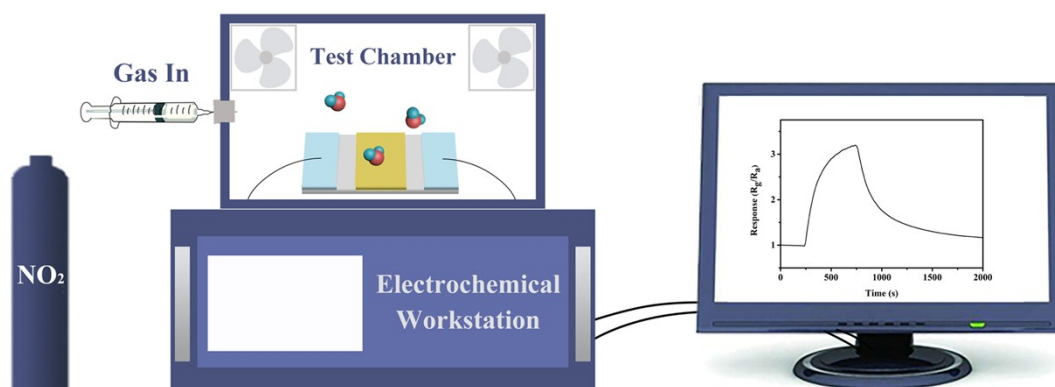

**Fig. S1.** Schematic diagram of the sensor measurement.

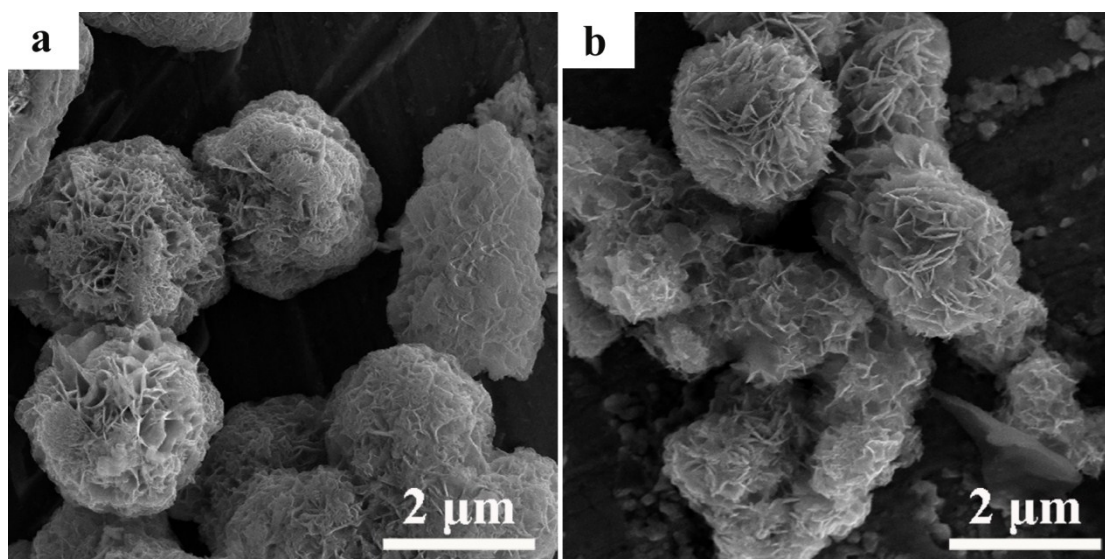

**Fig. S2.** SEM images of (a)  $\text{SnS}_2/\text{SnS}$ -6 and (b)  $\text{SnS}_2/\text{SnS}$ -1.

**Table S1.** EDS elemental analysis of  $\text{SnS}_2/\text{SnS}$ -1,  $\text{SnS}_2/\text{SnS}$ -3, and  $\text{SnS}_2/\text{SnS}$ -6.

| Sample                       | S (%) | Sn (%) | S/Sn |
|------------------------------|-------|--------|------|
| $\text{SnS}_2/\text{SnS}$ -1 | 55.56 | 44.44  | 1.15 |
| $\text{SnS}_2/\text{SnS}$ -3 | 61.13 | 38.87  | 1.59 |
| $\text{SnS}_2/\text{SnS}$ -6 | 63.51 | 36.49  | 1.74 |

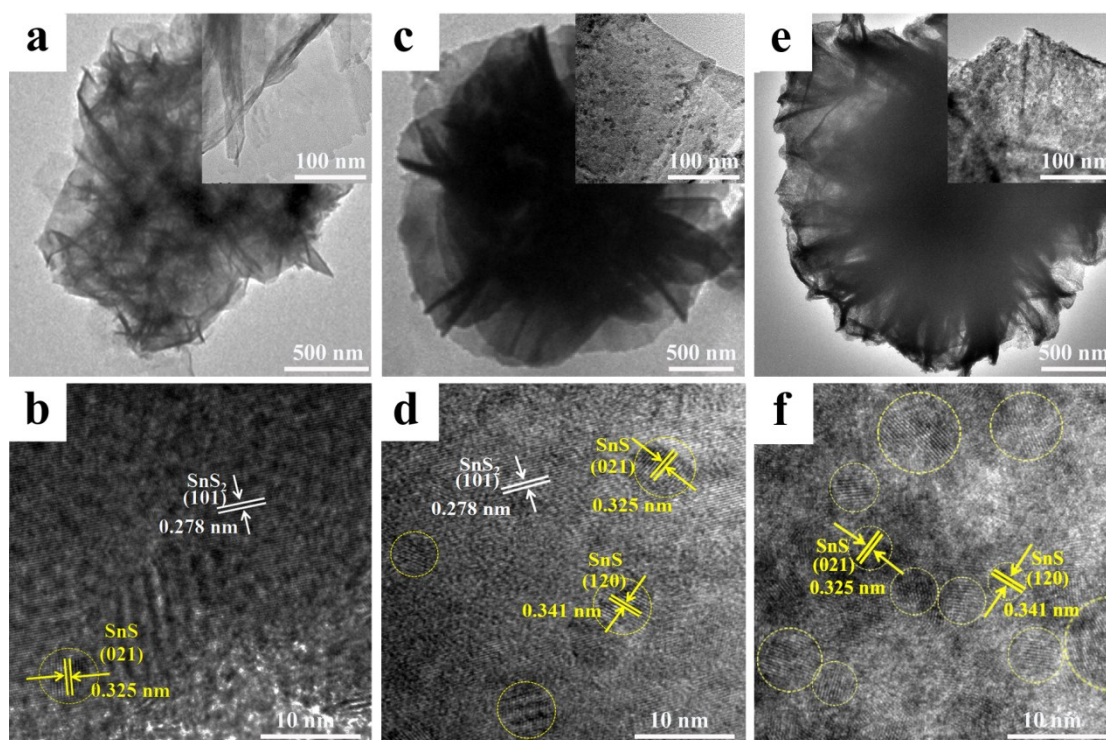

**Fig. S3.** TEM (top) and HRTEM (bottom) images of  $\text{SnS}_2/\text{SnS}$  heterostructures with different molar ratios of Sn/S in the precursors, (a) (b)  $\text{SnS}_2/\text{SnS}$ -6, (c) (d)  $\text{SnS}_2/\text{SnS}$ -3, and (e) (f)  $\text{SnS}_2/\text{SnS}$ -1.

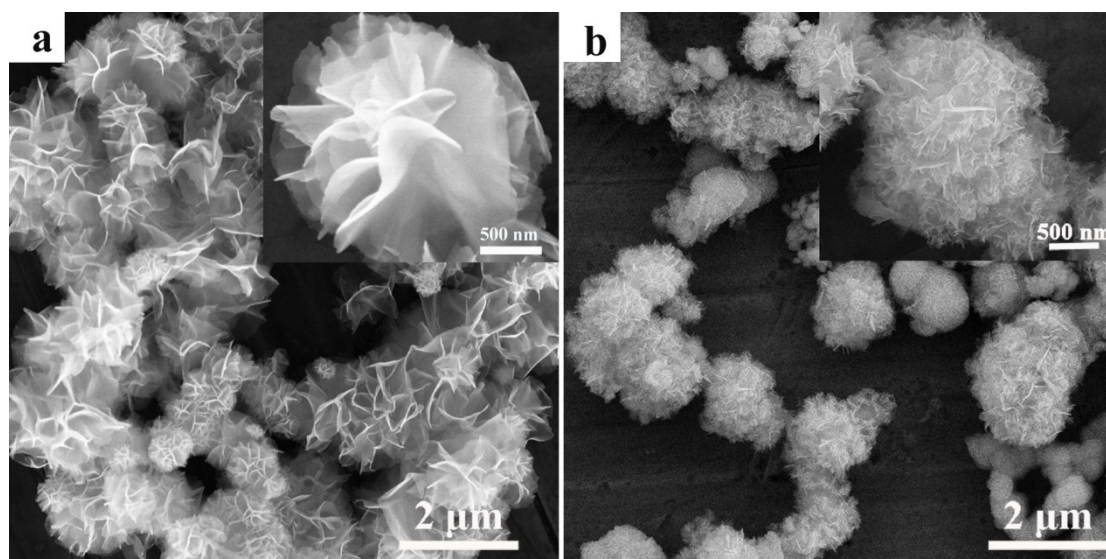

**Fig. S4.** SEM images of (a) pristine  $\text{SnS}_2$  and (b) pristine  $\text{SnS}$ .

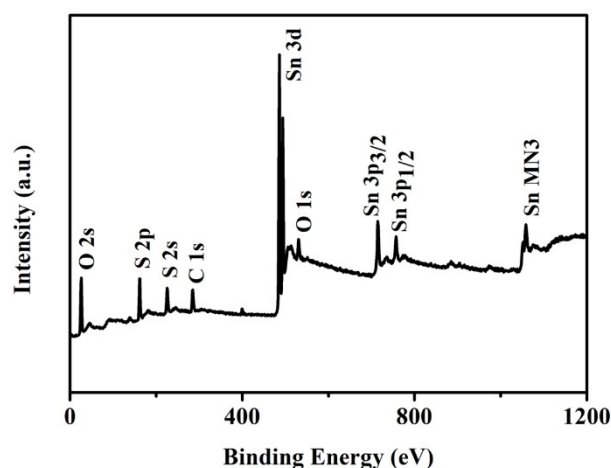

**Fig. S5.** Survey XPS spectrum of the hierarchical  $\text{SnS}_2/\text{SnS-3}$  heterostructures.

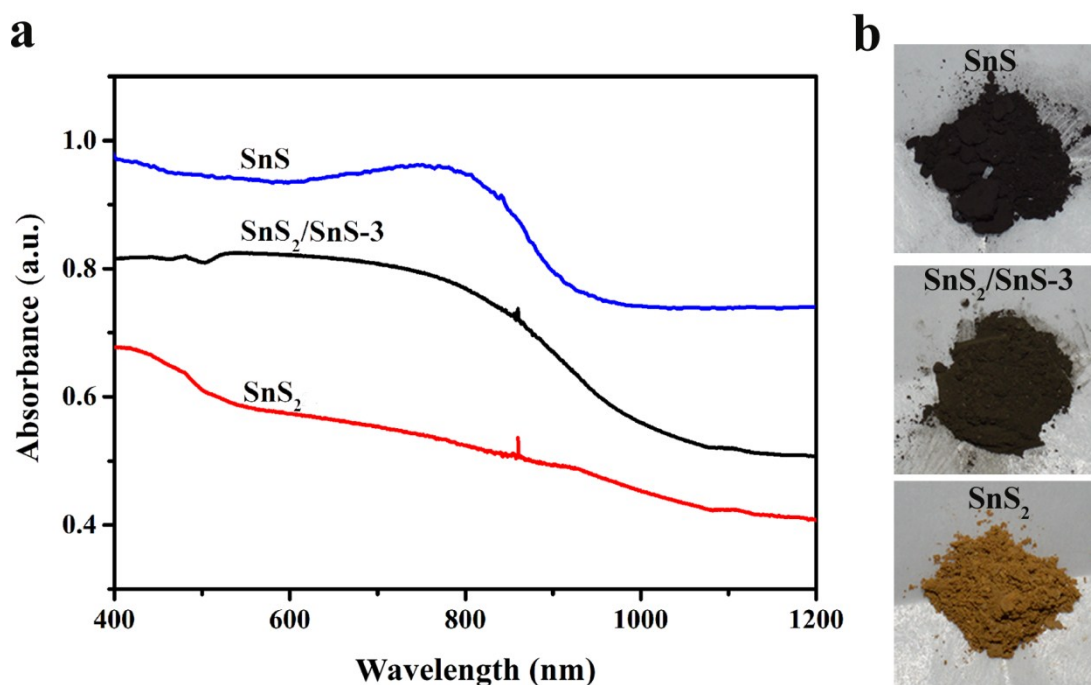

**Fig. S6.** (a) UV-vis diffuse reflectance spectra (DRS) and (b) digital graphs of  $\text{SnS}$ ,  $\text{SnS}_2/\text{SnS-3}$ , and  $\text{SnS}_2$ . In Fig. S6a,  $\text{SnS}_2$  shows a significant increase in the absorption at wavelengths shorter than 500 nm. While  $\text{SnS}$  shows a wide absorption range with absorbance peak around 800 nm. For  $\text{SnS}_2/\text{SnS-3}$ , the curve reflects the combination of spectral response of  $\text{SnS}_2$  and  $\text{SnS}$ : it has two absorbance peaks located at around 450 nm and 800 nm, corresponding to the bandgaps of  $\text{SnS}_2$  and  $\text{SnS}$ . Moreover, the heterostructure of  $\text{SnS}_2/\text{SnS-3}$  is also implied by the sample color (Fig. S6b), which is between yellow of  $\text{SnS}_2$  and black of  $\text{SnS}$ .



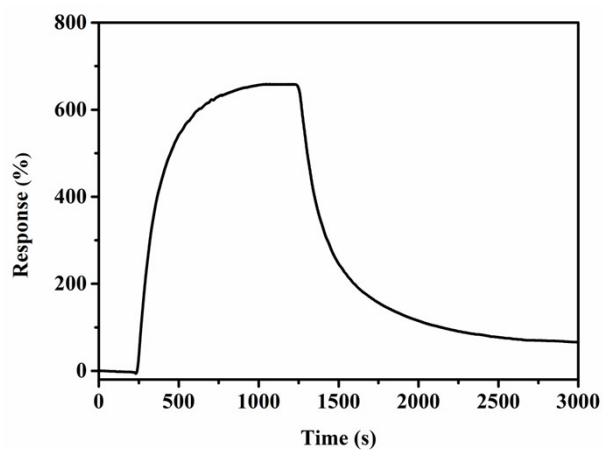

**Fig. S7.** Dynamic response-recovery curve of the  $\text{SnS}_2/\text{SnS-3}$  sensor exposure to 4 ppm  $\text{NO}_2$  with sensing time of 1000 s.

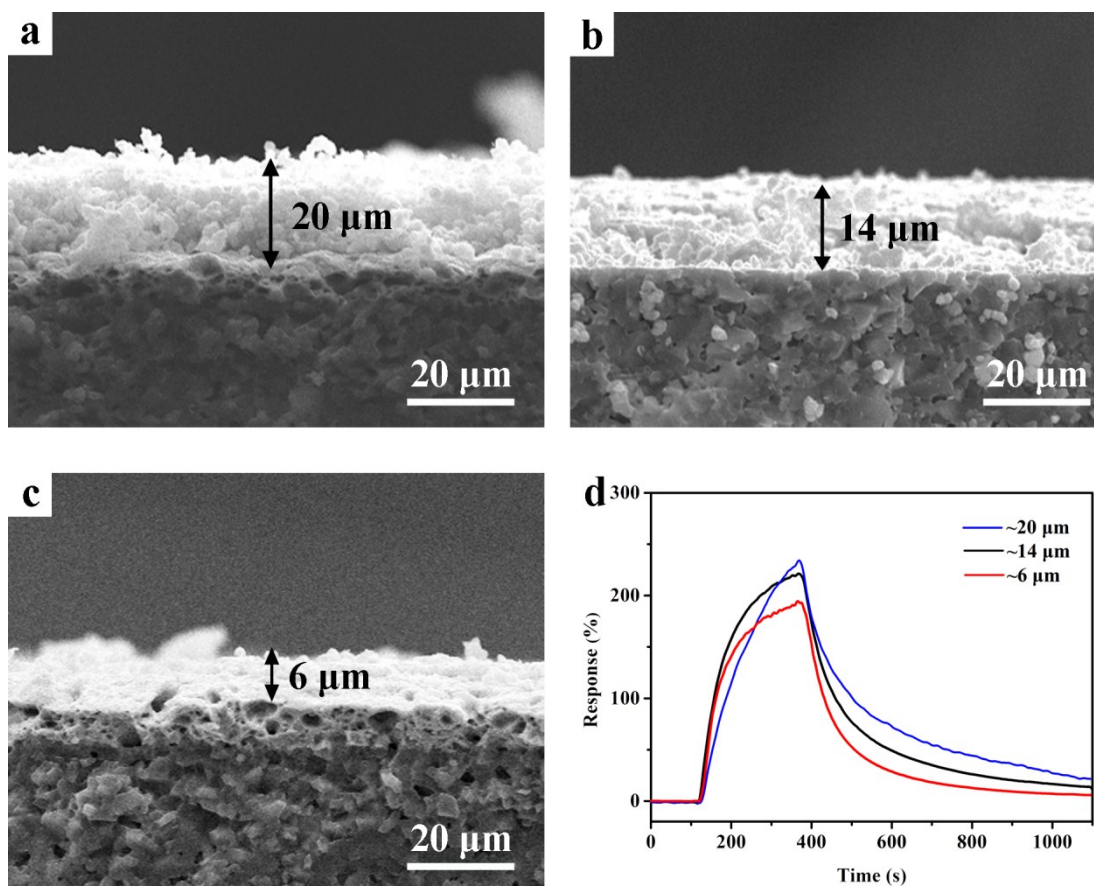

**Fig. S8.** Cross-sectional-view SEM images of the  $\text{SnS}_2/\text{SnS-3}$  sensor with different thickness: (a) ~20  $\mu\text{m}$ , (b) ~14  $\mu\text{m}$ , (c) ~6  $\mu\text{m}$ , and their sensing response curves toward 1 ppm  $\text{NO}_2$  at room temperature (d).

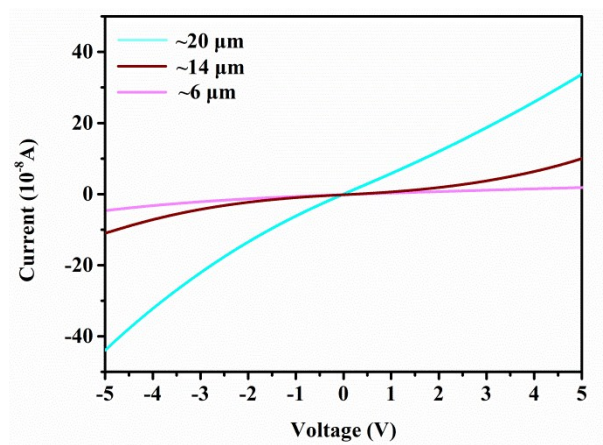

**Fig. S9.** I-V curve of the SnS<sub>2</sub>/SnS-3 sensor with different thickness.

**Table S2.** The recovery time of the SnS<sub>2</sub>/SnS-3 sensor toward various concentrations of NO<sub>2</sub> at room temperature. The recovery time is calculated by the time difference between reaching the final response point and the 90% recovery point.

| Conc. (ppm)       | 0.125 | 0.25 | 0.5  | 1    | 2    | 4    | 6    | 8   |
|-------------------|-------|------|------|------|------|------|------|-----|
| Response time (s) | 391   | 370  | 375  | 300  | 328  | 365  | 369  | 373 |
| Recovery time (s) | 1567  | 1579 | 1590 | 1379 | 1332 | 1216 | 1065 | 997 |

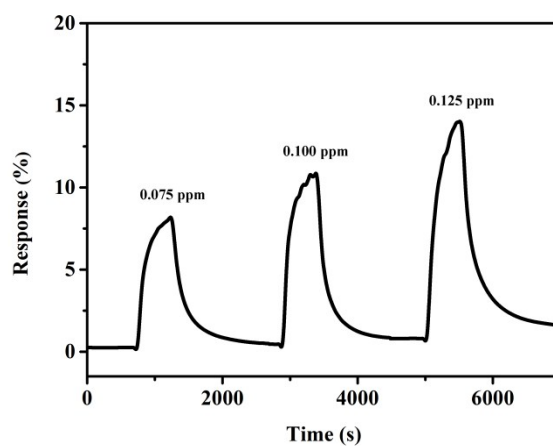

**Fig. S10.** The response of the SnS<sub>2</sub>/SnS-3 sensor to 0.075, 0.100, and 0.125 ppm NO<sub>2</sub> at room temperature.

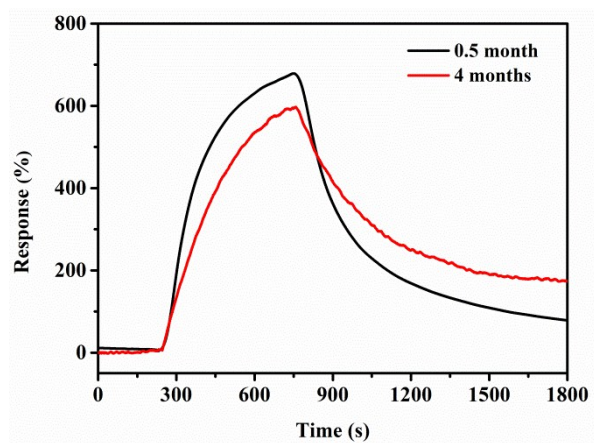

**Fig. S11.** The response and recovery curve of the  $\text{SnS}_2/\text{SnS-3}$  sensor after aging 0.5 month and 4 months to 4 ppm  $\text{NO}_2$  at room temperature.

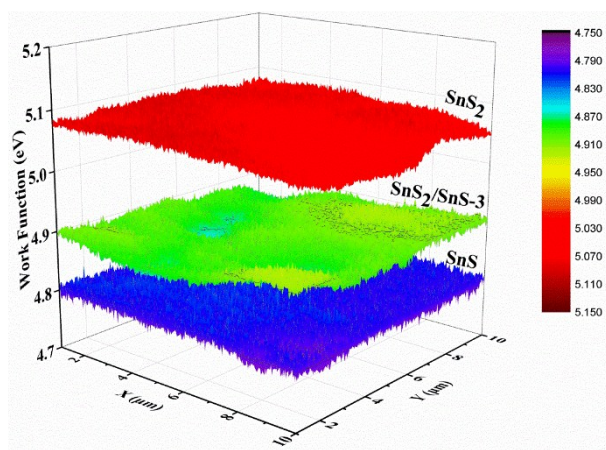

**Fig. S12.** Work functions of  $\text{SnS}_2$  (5.07 eV),  $\text{SnS}/\text{SnS}_2\text{-3}$  (4.89 eV), and  $\text{SnS}$  (4.79 eV) measured by Kelvin probe based on 218 data points.

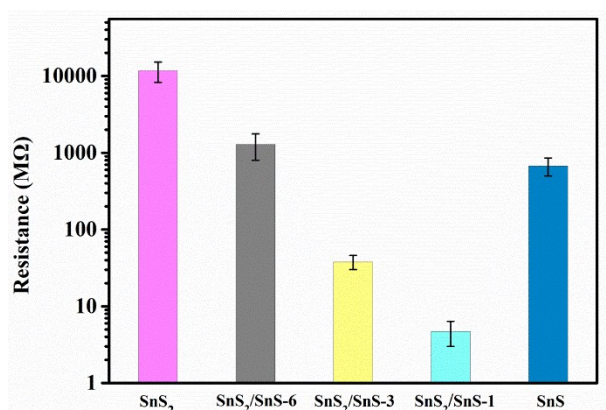

**Fig. S13.** Working resistance of the  $\text{SnS}_2$ ,  $\text{SnS}_2/\text{SnS-6}$ ,  $\text{SnS}_2/\text{SnS-3}$ ,  $\text{SnS}_2/\text{SnS-1}$ , and  $\text{SnS}$  sensors.

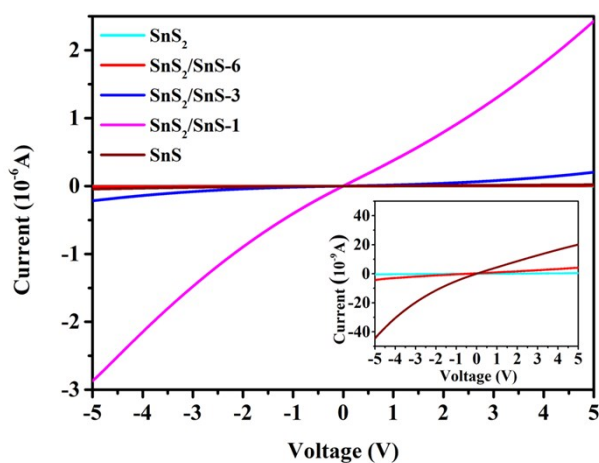

**Fig. S14.**  $I$ - $V$  curve of the pristine  $\text{SnS}_2$ ,  $\text{SnS}_2/\text{SnS-6}$ ,  $\text{SnS}_2/\text{SnS-3}$ ,  $\text{SnS}_2/\text{SnS-1}$ , and pristine  $\text{SnS}$  sensors.

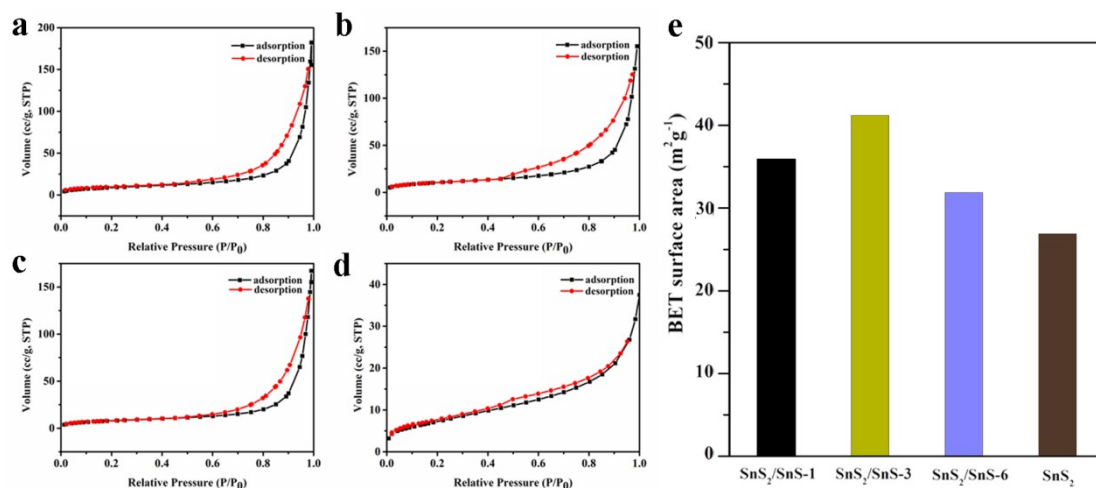

**Fig. S15.** Nitrogen adsorption/desorption isotherms of (a)  $\text{SnS}_2/\text{SnS-1}$ , (b)  $\text{SnS}_2/\text{SnS-3}$ , (c)  $\text{SnS}_2/\text{SnS-6}$ , (d) pristine  $\text{SnS}_2$ , and (e) their corresponding Brunauer-Emmett-Teller (BET) surface area.
